# Supplementary material
Source: ML conference proceedings conference paper supplement (https://openaccess.thecvf.com/content/CVPR2024/html/Pan_CLIP-BEVFormer_Enhancing_Multi-View_CVPR_2024_paper.html)
Supplement: Supplementary file 1 [file Pan_CLIP-BEVFormer_Enhancing_Multi-View_CVPR_2024_supplemental.pdf]

# CLIP-BEVFormer: Enhancing Multi-View Image-Based BEV Detector with Ground Truth Flow

## Supplementary Material

|     |                                                                                                                                   |     |
|-----|-----------------------------------------------------------------------------------------------------------------------------------|-----|
| 001 | <b>1. Experiment Setup</b>                                                                                                        |     |
| 002 | In our experiments, we adopt ResNet50 and ResNet101                                                                               |     |
| 003 | [2] as backbones for the BEVFormer-tiny and BEVFormer-                                                                            |     |
| 004 | base models, respectively. These backbones are initialized                                                                        |     |
| 005 | from the FCOS3D [6] checkpoint, following the configura-                                                                          |     |
| 006 | tion in BEVFormer [3]. We leverage the output multi-scale                                                                         |     |
| 007 | features from the Feature Pyramid Network (FPN) [4], with                                                                         |     |
| 008 | sizes of 1/16, 1/32, and 1/64, and the dimension of 256.                                                                          |     |
| 009 | During the training phase for CLIP-BEVFormer, we lever-                                                                           |     |
| 010 | age the pretrained language model in CLIP-RN101 [5] as                                                                            |     |
| 011 | our off-the-shelf language model.                                                                                                 |     |
| 012 | The BEV size for the tiny and base variants is set to $50 \times$                                                                 |     |
| 013 | $50$ and $200 \times 200$ , respectively, while the perception ranges                                                             |     |
| 014 | span from $-51.2\text{m}$ to $51.2\text{m}$ along the X and Y axes. The                                                           |     |
| 015 | resolution of the BEV grid is set to $0.512\text{m}$ . We incorporate                                                             |     |
| 016 | learnable positional embeddings for BEV queries to enrich                                                                         |     |
| 017 | the spatial representation.                                                                                                       |     |
| 018 | The BEV encoder comprises 6 encoder layers, consis-                                                                               |     |
| 019 | tently refining BEV queries in each layer. During the spatial                                                                     |     |
| 020 | cross-attention module, implemented using the deformable                                                                          |     |
| 021 | attention mechanism, each local query corresponds to four                                                                         |     |
| 022 | target points with different heights in 3D space. The prede-                                                                      |     |
| 023 | efined height anchors are uniformly sampled from $-5$ meters                                                                      |     |
| 024 | to $3$ meters.                                                                                                                    |     |
| 025 | For each reference point on 2D view features, we utilize                                                                          |     |
| 026 | four sampling points around this reference point for each                                                                         |     |
| 027 | head. During training, we use a 2-frame history BEV for the                                                                       |     |
| 028 | tiny variant and a 3-frame history BEV for the base variant.                                                                      |     |
| 029 | We train our models for 24 epochs with a learning rate of                                                                         |     |
| 030 | $2 \times 10^{-4}$ [3].                                                                                                           |     |
| 031 | <b>2. 3D Object Detection Results with Various</b>                                                                                |     |
| 032 | <b>Baselines</b>                                                                                                                  |     |
| 033 | We have conducted experiments with various detection                                                                              |     |
| 034 | baselines, BEVformer [3], BEVformerV2 [7], and BEVerse                                                                            |     |
| 035 | [8]. We evaluate our model on both validation and test sets                                                                       |     |
| 036 | of nuScenes. The results presented in Tab. 1 show that our                                                                        |     |
| 037 | method consistently improves the perception capabilities of                                                                       |     |
| 038 | various baselines by significant margins on both sets, indi-                                                                      |     |
| 039 | cating its flexibility and model-agnostic nature.                                                                                 |     |
| 040 | <b>3. 3D Object Detection Metrics</b>                                                                                             |     |
| 041 | We adhere to standard evaluation metrics for 3D detection                                                                         |     |
| 042 | on the nuScenes dataset [1], encompassing metrics such as                                                                         |     |
| 043 | mean Average Precision (mAP), Average Translation Er-                                                                             |     |
| 044 | ror (ATE), Average Scale Error (ASE), Average Orientation                                                                         |     |
|     | Error (AOE), Average Velocity Error (AVE), Average At-                                                                            | 045 |
|     | tribute Error (AAE), and nuScenes detection score (NDS).                                                                          | 046 |
|     | <b>Mean Average Precision (mAP).</b> For mAP, we utilize the                                                                      | 047 |
|     | Average Precision metric, modifying the definition of a                                                                           | 048 |
|     | match by considering the 2D center distance on the ground                                                                         | 049 |
|     | plane instead of intersection over union-based affinities.                                                                        | 050 |
|     | Specifically, we match predictions with ground truth ob-                                                                          | 051 |
|     | jects based on the smallest center distance within a certain                                                                      | 052 |
|     | threshold. Average precision (AP) is calculated by integrat-                                                                      | 053 |
|     | ing the recall vs precision curve for recalls and precisions                                                                      | 054 |
|     | $> 0.1$ . We then average over match thresholds of 0.5, 1, 2,                                                                     | 055 |
|     | 4 meters and compute the mean across classes.                                                                                     | 056 |
|     | <b>True Positives (TP).</b> TP metrics are designed to measure                                                                    | 057 |
|     | translation, scale, orientation, velocity, and attribute errors.                                                                  | 058 |
|     | These are calculated using a threshold of 2m center distance                                                                      | 059 |
|     | during matching and are positive scalars. Metrics are de-                                                                         | 060 |
|     | efined per class, and we then take the mean over classes to                                                                       | 061 |
|     | calculate mATE, mASE, mAOE, mAVE, and mAAE.                                                                                       | 062 |
|     | <ul style="list-style-type: none"><li><b>Average Translation Error (ATE).</b> Euclidean center dis-</li></ul>                     | 063 |
|     | tance in 2D in meters.                                                                                                            | 064 |
|     | <ul style="list-style-type: none"><li><b>Average Scale Error (ASE).</b> Calculated as <math>1 - \text{IOU}</math> after</li></ul> | 065 |
|     | aligning centers and orientation.                                                                                                 | 066 |
|     | <ul style="list-style-type: none"><li><b>Average Orientation Error (AOE).</b> Smallest yaw angle</li></ul>                        | 067 |
|     | difference between prediction and ground truth in radi-                                                                           | 068 |
|     | ans. Orientation error is evaluated at 360 degrees for most                                                                       | 069 |
|     | classes, except barriers, where it is evaluated at 180 de-                                                                        | 070 |
|     | grees. Orientation errors for cones are ignored.                                                                                  | 071 |
|     | <ul style="list-style-type: none"><li><b>Average Velocity Error (AVE).</b> Absolute velocity error</li></ul>                      | 072 |
|     | in m/s. Velocity error for barriers and cones is ignored.                                                                         | 073 |
|     | <ul style="list-style-type: none"><li><b>Average Attribute Error (AAE).</b> Calculated as <math>1 - \text{acc}</math>,</li></ul>  | 074 |
|     | where acc is the attribute classification accuracy. At-                                                                           | 075 |
|     | tribute error for barriers and cones is ignored.                                                                                  | 076 |
|     | <b>nuScenes Detection Score (NDS).</b> We consolidate the                                                                         | 077 |
|     | above metrics by computing a weighted sum: mAP, mATE,                                                                             | 078 |
|     | mASE, mAOE, mAVE, and mAAE. As a first step, we                                                                                   | 079 |
|     | convert TP errors to TP scores using $\text{TP\_score} = \max(1 -$                                                                | 080 |
|     | $\text{TP\_error}, 0.0)$ . We then assign a weight of 5 to mAP and 1                                                              | 081 |
|     | to each of the 5 TP scores, calculating the normalized sum.                                                                       | 082 |
|     | <b>4. Training and Inference Efficiency</b>                                                                                       | 083 |
|     | Our model is trained with 4 A100 80GB GPUs. Our method                                                                            | 084 |
|     | does not introduce any additional parameters and computa-                                                                         | 085 |
|     | tions during the inference stage, which means that it allows                                                                      | 086 |
|     | for enhanced performance without sacrificing real-time pro-                                                                       | 087 |
|     | cessing capabilities. We provide detailed information on                                                                          | 088 |
|     | memory, training time, number of parameters and FPS in                                                                            | 089 |
|     | Tab. 2.                                                                                                                           | 090 |

091 **5. Visualization**

092 In Fig. 1 and Fig. 2, we present a comprehensive visualiza-  
093 tion of the qualitative detection performance achieved by  
094 CLIP-BEVFormer. The images provide insights into both  
095 camera and Bird’s Eye View (BEV) perspectives, offering  
096 a nuanced understanding of the model’s predictions. No-  
097 tably, these visualizations highlight the enhanced alignment  
098 between CLIP-BEVFormer’s predictions and ground truth  
099 detections in both camera and BEV views, underscoring the  
100 model’s proficiency in accurately capturing the 3D environ-  
101 ment.

102 **References**

- 103 [1] Holger Caesar, Varun Bankiti, Alex H Lang, Sourabh Vora,  
104 Venice Erin Liong, Qiang Xu, Anush Krishnan, Yu Pan, Gi-  
105 ancarmo Baldan, and Oscar Beijbom. nuscnescenes: A multi-  
106 modal dataset for autonomous driving. In *Proceedings of the*  
107 *IEEE/CVF conference on computer vision and pattern recog-*  
108 *niton*, pages 11621–11631, 2020. 1
- 109 [2] Kaiming He, Xiangyu Zhang, Shaoqing Ren, and Jian Sun.  
110 Deep residual learning for image recognition. In *Proceedings*  
111 *of the IEEE conference on computer vision and pattern recog-*  
112 *niton*, pages 770–778, 2016. 1
- 113 [3] Zhiqi Li, Wenhai Wang, Hongyang Li, Enze Xie, Chonghao  
114 Sima, Tong Lu, Yu Qiao, and Jifeng Dai. Bevformer: Learn-  
115 ing bird’s-eye-view representation from multi-camera images  
116 via spatiotemporal transformers. In *European conference on*  
117 *computer vision*, pages 1–18. Springer, 2022. 1
- 118 [4] Tsung-Yi Lin, Piotr Dollár, Ross Girshick, Kaiming He,  
119 Bharath Hariharan, and Serge Belongie. Feature pyramid net-  
120 works for object detection. In *Proceedings of the IEEE confer-*  
121 *ence on computer vision and pattern recognition*, pages 2117–  
122 2125, 2017. 1
- 123 [5] Alec Radford, Jong Wook Kim, Chris Hallacy, Aditya  
124 Ramesh, Gabriel Goh, Sandhini Agarwal, Girish Sastry,  
125 Amanda Askell, Pamela Mishkin, Jack Clark, et al. Learn-  
126 ing transferable visual models from natural language supervi-  
127 sion. In *International conference on machine learning*, pages  
128 8748–8763. PMLR, 2021. 1
- 129 [6] Tai Wang, Xinge Zhu, Jiangmiao Pang, and Dahua Lin.  
130 Fcos3d: Fully convolutional one-stage monocular 3d object  
131 detection. In *Proceedings of the IEEE/CVF International*  
132 *Conference on Computer Vision*, pages 913–922, 2021. 1
- 133 [7] Chenyu Yang, Yuntao Chen, Hao Tian, Chenxin Tao, Xizhou  
134 Zhu, Zhaoxiang Zhang, Gao Huang, Hongyang Li, Yu Qiao,  
135 Lewei Lu, et al. Bevformer v2: Adapting modern image back-  
136 bones to bird’s-eye-view recognition via perspective supervi-  
137 sion. In *Proceedings of the IEEE/CVF Conference on Com-*  
138 *puter Vision and Pattern Recognition*, pages 17830–17839,  
139 2023. 1
- 140 [8] Yunpeng Zhang, Zheng Zhu, Wenzhao Zheng, Junjie Huang,  
141 Guan Huang, Jie Zhou, and Jiwen Lu. Beverse: Unified per-  
142 ception and prediction in birds-eye-view for vision-centric au-  
143 tonomous driving. *arXiv preprint arXiv:2205.09743*, 2022. 1

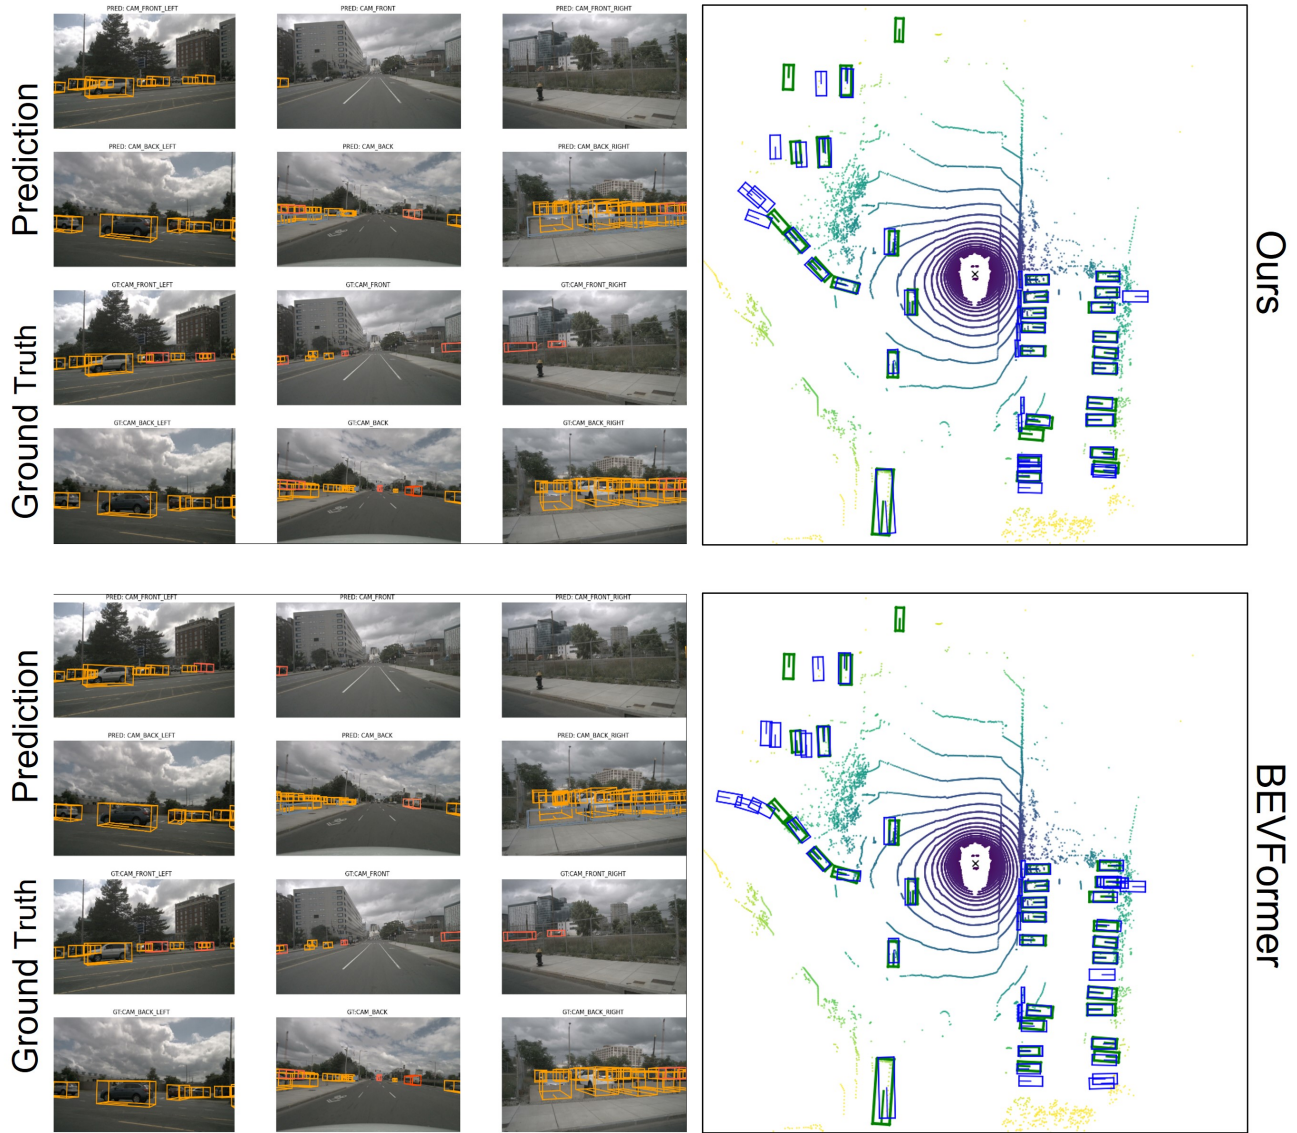

Figure 1. **Visualization results on nuScenes validation set.** We demonstrate qualitative detection performance on both camera and BEV images. As can be seen in BEV images, our CLIP-BEVFormer method demonstrates improved alignment with ground truth detections.

| Model          | Backbone | Validation Set |                |                   |                   |                   |                   |                   |                | Test Set       |                   |                   |                   |                   |                   |
|----------------|----------|----------------|----------------|-------------------|-------------------|-------------------|-------------------|-------------------|----------------|----------------|-------------------|-------------------|-------------------|-------------------|-------------------|
|                |          | NDS $\uparrow$ | mAP $\uparrow$ | mATE $\downarrow$ | mASE $\downarrow$ | mAOE $\downarrow$ | mAVE $\downarrow$ | mAAE $\downarrow$ | NDS $\uparrow$ | mAP $\uparrow$ | mATE $\downarrow$ | mASE $\downarrow$ | mAOE $\downarrow$ | mAVE $\downarrow$ | mAAE $\downarrow$ |
| BEVformer-tiny | R50      | 35.5           | 25.1           | 0.898             | 0.293             | 0.651             | 0.657             | <b>0.216</b>      | 37.2           | 27.3           | 0.856             | 0.283             | 0.609             | 0.753             | 0.146             |
| +Ours          | R50      | <b>38.8</b>    | <b>27.3</b>    | <b>0.856</b>      | <b>0.282</b>      | <b>0.583</b>      | <b>0.538</b>      | 0.228             | <b>41.1</b>    | <b>29.3</b>    | <b>0.811</b>      | <b>0.271</b>      | <b>0.554</b>      | <b>0.579</b>      | <b>0.136</b>      |
| BEVformer-base | R101     | 51.7           | 41.6           | 0.673             | 0.274             | 0.372             | 0.394             | 0.198             | 53.5           | 44.5           | 0.631             | 0.257             | <b>0.405</b>      | 0.435             | 0.143             |
| +Ours          | R101     | <b>55.1</b>    | <b>44.1</b>    | <b>0.641</b>      | <b>0.253</b>      | <b>0.319</b>      | <b>0.307</b>      | <b>0.172</b>      | <b>54.7</b>    | <b>44.7</b>    | <b>0.591</b>      | <b>0.257</b>      | 0.417             | <b>0.371</b>      | <b>0.128</b>      |
| BEVformerV2    | R50      | 42.6           | 35.1           | 0.753             | 0.286             | 0.466             | 0.807             | <b>0.186</b>      | 42.5           | 35.4           | 0.707             | 0.278             | 0.506             | <b>0.895</b>      | <b>0.134</b>      |
| +Ours          | R50      | <b>44.1</b>    | <b>37.0</b>    | <b>0.729</b>      | <b>0.281</b>      | <b>0.438</b>      | <b>0.791</b>      | 0.204             | <b>43.6</b>    | <b>37.9</b>    | <b>0.676</b>      | <b>0.272</b>      | <b>0.475</b>      | 0.975             | 0.141             |
| BEVerse        | Swin     | 46.6           | 32.1           | 0.681             | 0.278             | 0.466             | 0.328             | 0.190             | 50.1           | 36.2           | 0.610             | 0.257             | 0.451             | 0.355             | 0.131             |
| +Ours          | Swin     | <b>48.3</b>    | <b>34.2</b>    | <b>0.665</b>      | <b>0.270</b>      | <b>0.456</b>      | <b>0.318</b>      | <b>0.170</b>      | <b>52.2</b>    | <b>37.4</b>    | <b>0.556</b>      | <b>0.247</b>      | <b>0.413</b>      | <b>0.301</b>      | <b>0.129</b>      |

Table 1. 3D object detection results on nuScenes validation and test sets.



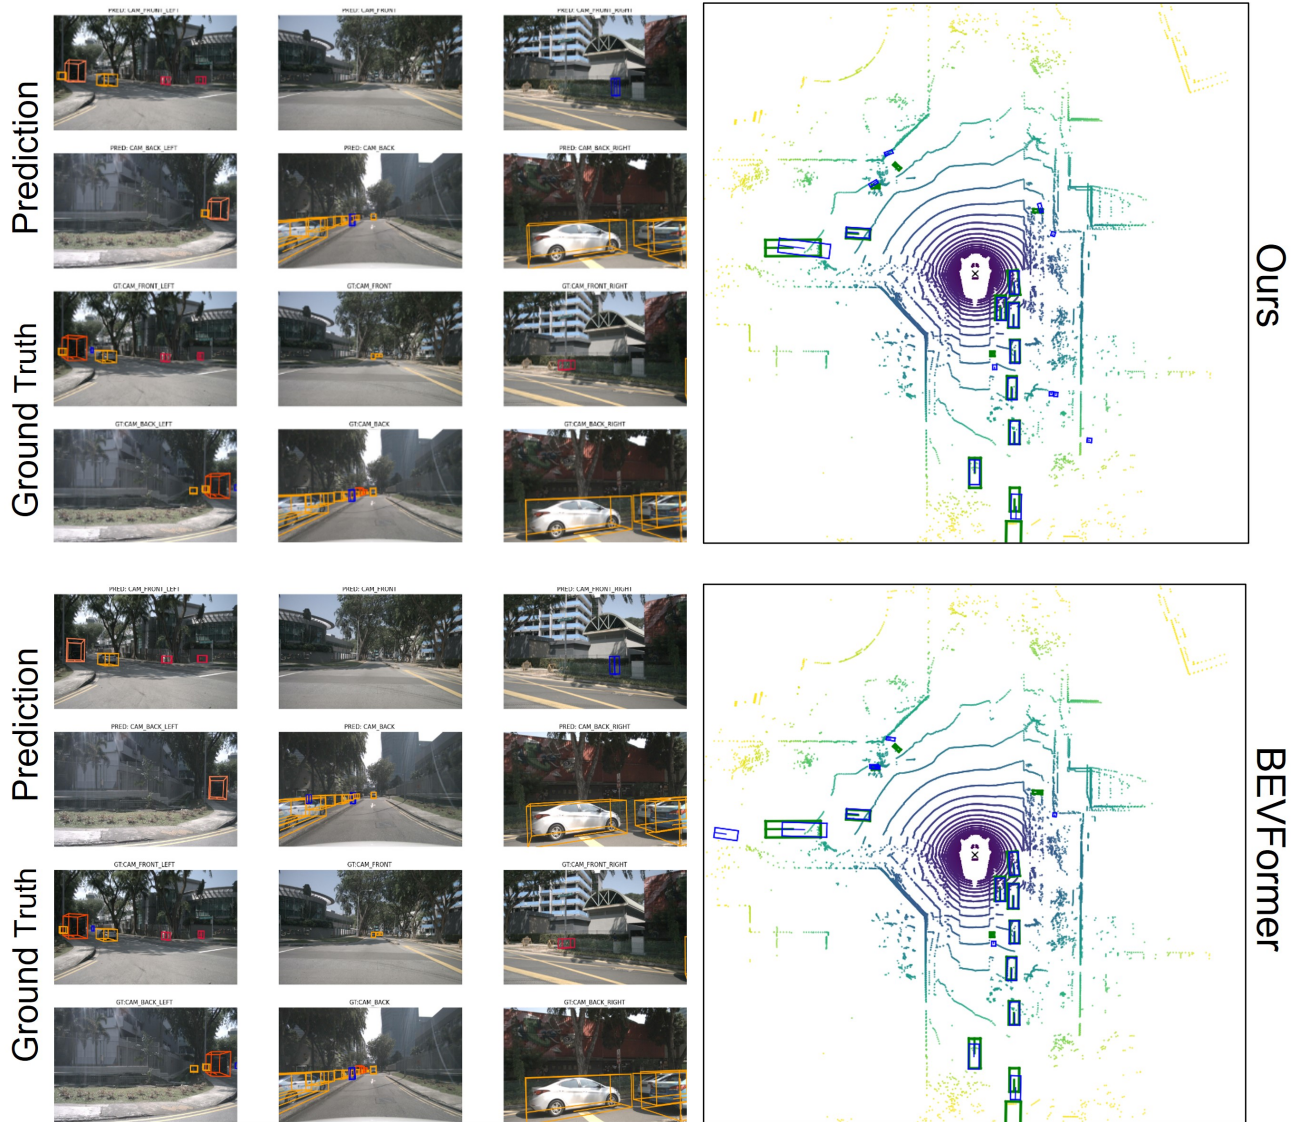

Figure 2. **Visualization results on nuScenes validation set.** Our CLIP-BEVFormer demonstrates improved alignment with ground truth detections on both camera and BEV images.

| Model          | Train Mem (GB) | Train Hrs | # Params (M) | FPS |
|----------------|----------------|-----------|--------------|-----|
| BEVformer-tiny | ~7             | ~46       | 33           | 5.1 |
| +Ours          | ~7             | ~46       | 33           | 5.1 |
| BEVformer-base | ~25            | ~90       | 69           | 2.1 |
| +Ours          | ~25            | ~90       | 69           | 2.1 |
| BEVformerV2    | ~46            | ~38       | 56           | 2.3 |
| +Ours          | ~46            | ~38       | 56           | 2.3 |
| BEVerse        | ~48            | ~72       | 102.5        | 4.4 |
| +Ours          | ~48            | ~72       | 102.5        | 4.4 |

Table 2. Efficiency details. FPS is tested on 1 V100 GPU.
